# Supplementary material
Source: PubMed Central journal article supplement (PMC3347122)
Supplement: supp_50.5.1752_JCM-JCM06817-11-s01.pdf [file supp_50.5.1752_JCM-JCM06817-11-s01.pdf]

**TABLE S1** Evaluation of the real-time multiplex PCR for the detection of EHEC O104:H4 against the HUSEC collection

| HUSEC no. | Strain no. | Serotype            | <i>stx</i> <sup>a</sup> | ST (CC) <sup>b</sup> | Result of real-time MPCR   |                         |                           |
|-----------|------------|---------------------|-------------------------|----------------------|----------------------------|-------------------------|---------------------------|
|           |            |                     |                         |                      | <i>wzy</i> <sub>O104</sub> | <i>stx</i> <sub>2</sub> | <i>fliC</i> <sub>H4</sub> |
| HUSEC001  | 05-946     | O111:H10            | 2                       | 43 (10)              | -                          | +                       | -                         |
| HUSEC002  | 5152/97    | Ont:H <sup>-</sup>  | 2                       | 330 (10)             | -                          | +                       | -                         |
| HUSEC003  | 6334/96    | O157:H7             | 2                       | 11 (11)              | -                          | +                       | -                         |
| HUSEC004  | 3072/96    | O157:H <sup>-</sup> | 2                       | 11 (11)              | -                          | +                       | -                         |
| HUSEC005  | 2907/97    | O55:H7              | 2                       | 335 (11)             | -                          | +                       | -                         |
| HUSEC006  | 5376/99    | O157:H <sup>-</sup> | 2                       | 587 (11)             | -                          | +                       | -                         |
| HUSEC007  | 7382/96    | O103:H2             | 2                       | 17 (20)              | -                          | +                       | -                         |
| HUSEC008  | 2791/97    | O103:H <sup>-</sup> | 2                       | 17 (20)              | -                          | +                       | -                         |
| HUSEC009  | 6833/96    | OR:H2               | 2                       | 17 (20)              | -                          | +                       | -                         |
| HUSEC010  | 1805/00    | O119:H2             | 1                       | 20 (20)              | -                          | -                       | -                         |
| HUSEC011  | 2516/00    | O111:H8             | 1+2                     | 16 (29)              | -                          | +                       | -                         |
| HUSEC012  | 6037/96    | O111:H <sup>-</sup> | 1+2                     | 16 (29)              | -                          | +                       | -                         |
| HUSEC013  | 2245/98    | O26:H11             | 1                       | 21 (29)              | -                          | -                       | -                         |
| HUSEC014  | 5080/97    | O26:H <sup>-</sup>  | 1+2                     | 21 (29)              | -                          | +                       | -                         |
| HUSEC015  | 126814/98  | OR:H11              | 1+2                     | 21 (29)              | -                          | +                       | -                         |
| HUSEC016  | 5028/97    | Ont:Hnt             | 1                       | 21 (29)              | -                          | -                       | -                         |
| HUSEC017  | 3319/99    | O26:H11             | 1+2                     | 27 (29)              | -                          | +                       | -                         |
| HUSEC018  | 1530/99    | O26:H11             | 2                       | 29 (29)              | -                          | +                       | -                         |
| HUSEC019  | 1588/98    | OR:H11              | 1                       | 29 (29)              | -                          | -                       | -                         |
| HUSEC020  | 3271/00    | O26:H11             | 2                       | 396 (29)             | -                          | +                       | -                         |
| HUSEC021  | 0488/99    | O145:H28            | 2                       | 32 (32)              | -                          | +                       | -                         |
| HUSEC022  | 4557/99    | O145:H <sup>-</sup> | 2                       | 137 (32)             | -                          | +                       | -                         |
| HUSEC023  | 1169/97/1  | O112:H <sup>-</sup> | 2d <sub>act</sub>       | 40 (40)              | -                          | +                       | -                         |
| HUSEC024  | 2996/96    | O73:H18             | 2d <sub>act</sub>       | 69 (69)              | -                          | +                       | -                         |
| HUSEC025  | 06-05009   | O55:Hnt             | 1                       | 101 (101)            | -                          | -                       | -                         |
| HUSEC026  | 99-09355   | O113:H21            | 2d <sub>act</sub>       | 56 (155)             | -                          | +                       | -                         |
| HUSEC027  | 03-07727   | O163:H19            | 2d <sub>act</sub>       | 654 (469)            | -                          | +                       | -                         |
| HUSEC028  | 03-06687   | O128:H2             | 1c+2d                   | 25 (n.a.)            | -                          | +                       | -                         |
| HUSEC029  | 4256/99    | O70:H8              | 2                       | 39 (n.a.)            | -                          | +                       | -                         |
| HUSEC030  | 05-03519   | O98:H <sup>-</sup>  | 1                       | 306 (n.a.)           | -                          | -                       | -                         |
| HUSEC031  | 7792/96    | OR:H <sup>-</sup>   | 1                       | 306 (n.a.)           | -                          | -                       | -                         |
| HUSEC032  | 2441/98    | O136:Hnt            | 1c+2                    | 329 (n.a.)           | -                          | +                       | -                         |
| HUSEC033  | 4392/97    | O145:H25            | 2                       | 342 (n.a.)           | -                          | +                       | -                         |
| HUSEC034  | 3332/99    | O91:H21             | 1+2+2d <sub>act</sub>   | 442 (n.a.)           | -                          | +                       | -                         |
| HUSEC035  | 1529/98    | O121:H19            | 2                       | 655 (n.a.)           | -                          | +                       | -                         |
| HUSEC036  | 2839/98    | O145:H <sup>-</sup> | 1+2c                    | 659 (n.a.)           | -                          | +                       | -                         |
| HUSEC037  | 02-03885   | O104:H21            | 1+2+2d <sub>act</sub>   | 672 (n.a.)           | +                          | +                       | -                         |
| HUSEC038  | 3356/97B   | Ont:H21             | 1+2d <sub>act</sub>     | 672 (n.a.)           | +                          | +                       | -                         |
| HUSEC039  | 3651/96    | O76:H19             | 1c                      | 675 (n.a.)           | -                          | -                       | -                         |
| HUSEC040  | 220/00     | O174:H21            | 2c                      | 677 (n.a.)           | -                          | +                       | -                         |
| HUSEC041  | 01-09591   | O104:H4             | 2                       | 678 (n.a.)           | +                          | +                       | +                         |
| HUSEC042  | 820/08     | O165:H25            | 2+2c                    | 119 (n.a.)           | -                          | +                       | -                         |

<sup>a</sup> *stx<sub>2dact</sub>* designates the allele encoding the mucus-activatable Stx2d (1), whereas *stx<sub>2d</sub>* is the allele encoding non-activatable Stx2d (2).

<sup>b</sup> ST, sequence type; CC, clonal complex; n.a., CC not assigned.

**TABLE S2** Evaluation of the real-time multiplex PCR for the detection of EHEC O104:H4 against a panel of EHEC strains of 120 different serotypes isolated from patients with diarrhea

| Strain     | Serotype           | <i>stx</i> <sup>a</sup> | Result of real-time MPCR   |                         |                           |
|------------|--------------------|-------------------------|----------------------------|-------------------------|---------------------------|
|            |                    |                         | <i>wzy</i> <sub>O104</sub> | <i>stx</i> <sub>2</sub> | <i>fliC</i> <sub>H4</sub> |
| 06-03488   | O1:H10             | 1                       | -                          | -                       | -                         |
| 05-06747   | O1:HNT             | 1                       | -                          | -                       | -                         |
| 05-00826   | O2:H6              | 2                       | -                          | +                       | -                         |
| 09-02342   | O2:H25             | 2g                      | -                          | +                       | -                         |
| 4693/97    | O3:H2              | 1                       | -                          | -                       | -                         |
| 5726/96    | O3:H10             | 1                       | -                          | -                       | -                         |
| 02-09990   | O5:H <sup>-</sup>  | 1c+2d                   | -                          | +                       | -                         |
| 3344/98    | O6:HNT             | 2                       | -                          | +                       | -                         |
| 3425/98    | O6:H <sup>-</sup>  | 2                       | -                          | +                       | -                         |
| 3432/96    | O8:H4              | 2                       | -                          | +                       | +                         |
| 3615/99    | O8:H10             | 2e                      | -                          | +                       | -                         |
| 7139/96    | O8:H19             | 1c                      | -                          | -                       | -                         |
| 3054/97    | O8:HNT             | 2e                      | -                          | +                       | -                         |
| 3229/98    | O8:H <sup>-</sup>  | 2e                      | -                          | +                       | -                         |
| 99-04062   | O15:H21            | 1                       | -                          | -                       | -                         |
| 01-03364   | O17:H18            | 1+2d <sub>act</sub>     | -                          | +                       | -                         |
| ST106      | O17:H45            | 2                       | -                          | +                       | -                         |
| 02-00577   | O22:H8             | 1+2d <sub>act</sub>     | -                          | +                       | -                         |
| 04-01861-2 | O22:H18            | 2d <sub>act</sub>       | -                          | +                       | -                         |
| ST287      | O22:H <sup>-</sup> | 1+2                     | -                          | +                       | -                         |
| 00-04093   | O23:H15            | 1+2                     | -                          | +                       | -                         |
| 3757/96    | O25:H <sup>-</sup> | 1                       | -                          | -                       | -                         |
| 3593/00    | O26:H11            | 1                       | -                          | -                       | -                         |
| 0573/99    | O26:H <sup>-</sup> | 1+2                     | -                          | +                       | -                         |
| 6480/96    | O40:H8             | 2d                      | -                          | +                       | -                         |
| 3055/97    | O41:H <sup>-</sup> | 2                       | -                          | +                       | -                         |
| 06-02712   | O55:HNT            | 1                       | -                          | -                       | -                         |
| 225/97     | O55:H <sup>-</sup> | 2                       | -                          | +                       | -                         |
| 0393/98    | O62:H <sup>-</sup> | 1                       | -                          | -                       | -                         |
| 2499/98    | O68:H4             | 1+2                     | -                          | +                       | +                         |
| 04-01488   | O69:H11            | 1                       | -                          | -                       | -                         |
| 04-03945   | O69:HNT            | 1                       | -                          | -                       | -                         |
| 04-07769   | O74:H42            | 1+2                     | -                          | +                       | -                         |
| 3465/97    | O74:H <sup>-</sup> | 1                       | -                          | -                       | + <sup>b</sup>            |
| 2030/00    | O75:H8             | 1c+2d                   | -                          | +                       | -                         |
| 521/99     | O76:H19            | 1c+2d                   | -                          | +                       | -                         |

|          |                     |                       |   |   |                |
|----------|---------------------|-----------------------|---|---|----------------|
| 3654/97  | O78:H <sup>-</sup>  | 1c                    | - | - | + <sup>b</sup> |
| 04-00162 | O80:H <sup>-</sup>  | 2                     | - | + | -              |
| 24196/97 | O86:H <sup>-</sup>  | 2d                    | - | + | -              |
| 06-03971 | O91:H8              | 2                     | - | + | -              |
| 05-06323 | O91:H10             | 1                     | - | - | -              |
| 0550/01  | O91:H14             | 1                     | - | - | -              |
| 01-09282 | O91:H21             | 2+2d <sub>act</sub>   | - | + | -              |
| 01-04459 | O91:HNT             | 1                     | - | - | -              |
| 3937/97  | O91:H <sup>-</sup>  | 1+2d                  | - | + | -              |
| 04-08825 | O98:H <sup>-</sup>  | 1                     | - | - | -              |
| ST126    | O100:H <sup>-</sup> | 2                     | - | + | -              |
| 3319/00  | O103:H2             | 1                     | - | - | -              |
| 1246/97  | O103:H18            | 1                     | - | - | -              |
| 02-03885 | O104:H21            | 1+2+2d <sub>act</sub> | + | + | -              |
| 06-04191 | O106:H18            | 1                     | - | - | -              |
| 03-01061 | O111:H8             | 1                     | - | - | -              |
| 4556/99  | O111:H <sup>-</sup> | 1                     | - | - | -              |
| 17170/98 | O112:H2             | 1c                    | - | - | -              |
| ST132    | O112:H18            | 1                     | - | - | -              |
| 02-10114 | O113:H4             | 1c+2d                 | - | + | +              |
| 01-02896 | O113:H21            | 2                     | - | + | -              |
| ST373    | O114:H <sup>-</sup> | 2                     | - | + | -              |
| 3159/01  | O115:H10            | 1                     | - | - | -              |
| 04-01073 | O115:H <sup>-</sup> | 1+2                   | - | + | -              |
| 04-02494 | O118:H16            | 1                     | - | - | -              |
| 7395/96  | O118:H <sup>-</sup> | 2                     | - | + | -              |
| ST205    | O119:H4             | 1+2                   | - | + | +              |
| 2763/99  | O121:H19            | 2                     | - | + | -              |
| H.I.8    | O128:H2             | 2f                    | - | - | -              |
| 4736/98  | O128:H <sup>-</sup> | 1+2d                  | - | + | -              |
| 06-08409 | O138:H8             | 2                     | - | + | -              |
| 05-09016 | O142:H <sup>-</sup> | 1                     | - | - | -              |
| 0917/99  | O145:H28            | 1                     | - | - | -              |
| 02-05558 | O146:H8             | 1c                    | - | - | -              |
| 02-09168 | O146:H21            | 1c+2d                 | - | + | -              |
| 02-07604 | O146:H28            | 2d                    | - | + | -              |
| 99-08365 | O146:H31            | 1c+2d                 | - | + | -              |
| 00-05700 | O146:H51            | 1c                    | - | - | -              |
| 02-00208 | O146:H <sup>-</sup> | 1+2d                  | - | + | -              |
| 04-08386 | O150:HNT            | 1+2                   | - | + | -              |

|          |                     |                     |   |   |   |
|----------|---------------------|---------------------|---|---|---|
| 06-03233 | O152:H <sup>-</sup> | 1                   | - | - | - |
| 02-09063 | O153:H18            | 1                   | - | - | - |
| 04-08828 | O153:H25            | 1+2                 | - | + | - |
| 00-02970 | O154:H20            | 2d <sub>act</sub>   | - | + | - |
| 05-05792 | O154:H31            | 1                   | - | - | - |
| 05-02092 | O154:HNT            | 1                   | - | - | - |
| 05-02523 | O156:H25            | 1                   | - | - | - |
| 4544/99  | O157:H7             | 1+2                 | - | + | - |
| 2518/00  | O157:H <sup>-</sup> | 2                   | - | + | - |
| ST 54    | O158:H <sup>-</sup> | 2                   | - | + | - |
| 04-05554 | O163:H19            | 2                   | - | + | - |
| 04-07734 | O165:H25            | 2                   | - | + | - |
| 98-8419  | O165:H <sup>-</sup> | 2                   | - | + | - |
| 03-00315 | O168:H8             | 2d <sub>act</sub>   | - | + | - |
| 99-00962 | O174:H2             | 1+2d <sub>act</sub> | - | + | - |
| 02-07607 | O174:H8             | 1c+2d               | - | + | - |
| 0973/99  | O174:H21            | 2d <sub>act</sub>   | - | + | - |
| 02-02016 | O174:H <sup>-</sup> | 1c+2d               | - | + | - |
| 02-02690 | O175:H16            | 2                   | - | + | - |
| 02-04450 | O175:H28            | 2d <sub>act</sub>   | - | + | - |
| 4728/00  | O176:H <sup>-</sup> | 1c+2d               | - | + | - |
| 06-00660 | O177:H <sup>-</sup> | 2                   | - | + | - |
| 02-05050 | O178:H <sup>-</sup> | 1c+2d               | - | + | - |
| 02-03738 | O178:H19            | 1+2                 | - | + | - |
| 01-10692 | O181:H16            | 1c+2d               | - | + | - |
| 01-02304 | O181:H49            | 1+2c                | - | + | - |
| 4941/97  | ONT:H2              | 1c+2d               | - | + | - |
| 24059/97 | ONT:H10             | 2e                  | - | + | - |
| 71/96    | ONT:H14             | 1                   | - | - | - |
| 06-02738 | ONT:H16             | 1                   | - | - | - |
| 3759/99  | ONT:H18             | 1+2d <sub>act</sub> | - | + | - |
| 3357/98  | ONT:H19             | 2e                  | - | + | - |
| 02-12094 | ONT:H21             | 2                   | - | + | - |
| 04-00309 | ONT:H25             | 1                   | - | - | - |
| 06-04928 | ONT:H28             | 1+2                 | - | + | - |
| 520/99   | ONT:H32             | 2d                  | - | + | - |
| 06-08055 | ONT:HNT             | 2                   | - | + | - |
| 2771/97  | ONT:H <sup>-</sup>  | 2e                  | - | + | - |
| 11205019 | Orough:H2           | 1c+2d               | - | + | - |
| 99-02787 | Oraugh:H10          | 1                   | - | - | - |

|          |                       |     |   |   |   |
|----------|-----------------------|-----|---|---|---|
| 5157/96  | Orough:H19            | 2   | - | + | - |
| 02-09548 | Orough:H21            | 1+2 | - | + | - |
| 4831/97  | Orough:H45            | 2d  | - | + | - |
| 1453/97  | Orough:H <sup>-</sup> | 1   | - | - | - |

<sup>a</sup> *stx*<sub>2dact</sub> designates the allele encoding the mucus-activatable Stx2d (1), whereas *stx*<sub>2d</sub> is the allele encoding non-activatable Stx2d (2).

<sup>b</sup> Both strains possess *fliC*<sub>H4</sub> as determined by *fliC* restriction fragment length polymorphism.

## Supplemental Reference

1. **Bielaszewska M, Friedrich AW, Aldick T, Schürk-Bulgrin R, Karch H.** 2006. Shiga toxin activatable by intestinal mucus in *Escherichia coli* isolated from humans: predictor for a severe clinical outcome. *Clin. Infect. Dis.* **43**:1160-1167.
2. **Piérard D, Muyldermans G, Moriau L, Stevens D, Lauwers S.** 1998. Identification of new verocytotoxin type 2 variant B-subunit genes in human and animal *Escherichia coli* isolates. *J. Clin. Microbiol.* **36**:3317-3322.
